# Supplementary material for: Activation of the NLRP1 inflammasome in human keratinocytes by the dsDNA mimetic poly(dA:dT)
Source: PubMed Central journal article supplement — Proc Natl Acad Sci U S A. 2023 Jan 24;120(5):e2213777120. doi: 10.1073/pnas.2213777120 (PMC9945980; doi:10.1073/pnas.2213777120), 2023-01-24
Supplement: pnas.2213777120.sapp.pdf [file pnas.2213777120.sapp.pdf]

## **Supplementary Information for** Activation of the NLRP1 inflammasome in human keratinocytes by the dsDNA mimetic poly(dA:dT)

Jeffrey Y Zhou<sup>1</sup>, Mrinal K Sarkar<sup>2</sup>, Ken Okamura<sup>3</sup>, John E Harris<sup>3</sup>, Johann E Gudjonsson<sup>2</sup>, and  
Katherine A Fitzgerald<sup>1</sup>

<sup>1</sup>Division of Innate Immunity, Department of Medicine, University of Massachusetts Chan Medical  
School, Worcester MA

<sup>2</sup>Department of Dermatology, University of Michigan, Ann Arbor MI

<sup>3</sup>Department of Dermatology, University of Massachusetts Chan Medical School, Worcester MA

Corresponding author: Katherine A Fitzgerald

Email: [Kate.Fitzgerald@umassmed.edu](mailto:Kate.Fitzgerald@umassmed.edu)

### **This PDF file includes:**

- Figures S1 to S4
- Tables S1 to S4
- Legends for Movies S1
- Legends for Dataset S1
- SI References

### **Other supplementary materials for this manuscript include the following:**

- Dataset S1
- Movies S1

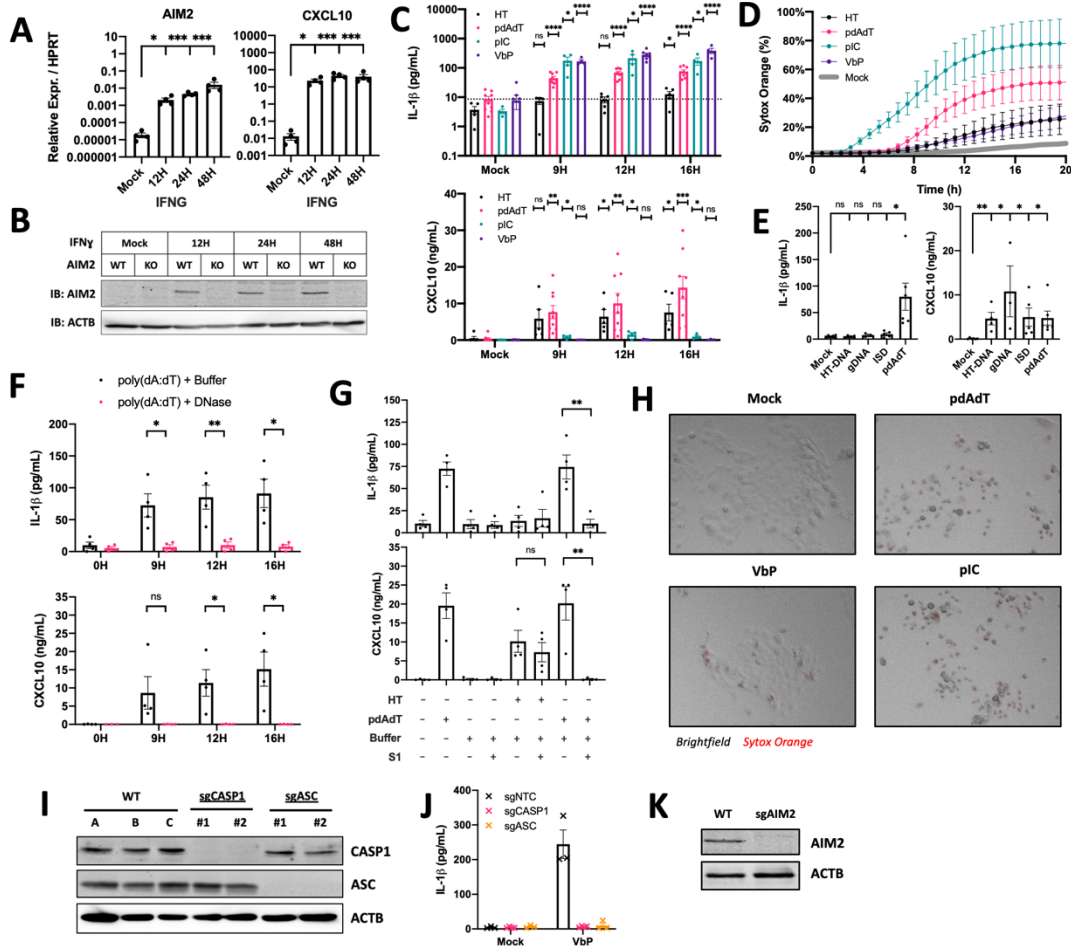

**Figure S1. The complex structure of poly(dA:dT) distinguishes it from linear dsDNA. (A-B)** N/TERT2G wild type or monoclonal knockout keratinocytes were treated with 100 ng/mL IFN $\gamma$  for indicated time points and collected for qPCR or western blot (n=3). **(C)** N/TERT2G were transfected with 1  $\mu$ g/mL HT-DNA, poly(dA:dT), poly(I:C), or stimulated with 5  $\mu$ M VbP and analyzed by ELISA (n=5-8) or **(D)** sytox orange time lapse imaging (n=4-6) with a **(H)** representative image at 12H. **(E)** N/TERT2G were transfected with 1  $\mu$ g/mL of the indicated nucleic acid and collected at 12H for ELISA (n=3-5). **(F-G)** 1  $\mu$ g/mL poly(dA:dT) or HT-DNA was digested with DNase I, S1 nuclease, or buffer without enzyme and transfected into N/TERT2G for 12H. Supernatants were analyzed by ELISA (n=4). **(I, K)** Western blots were performed on monoclonal N/TERT2G knockout cell lines. **(J)** Monoclonal N/TERT2G knockout cell lines were stimulated with 5  $\mu$ M VbP (each data point is an independent clone) and ELISA was performed on supernatants. Data represents mean  $\pm$  SEM **(A, C-G, J)** or a representative image **(B, H)** from at least three independent experiments. If not otherwise indicated, statistical comparisons were made with respect to the mock-treated control. \*P < 0.05, \*\*P < 0.01, \*\*\*P < 0.001, two-tailed Student's t-test.

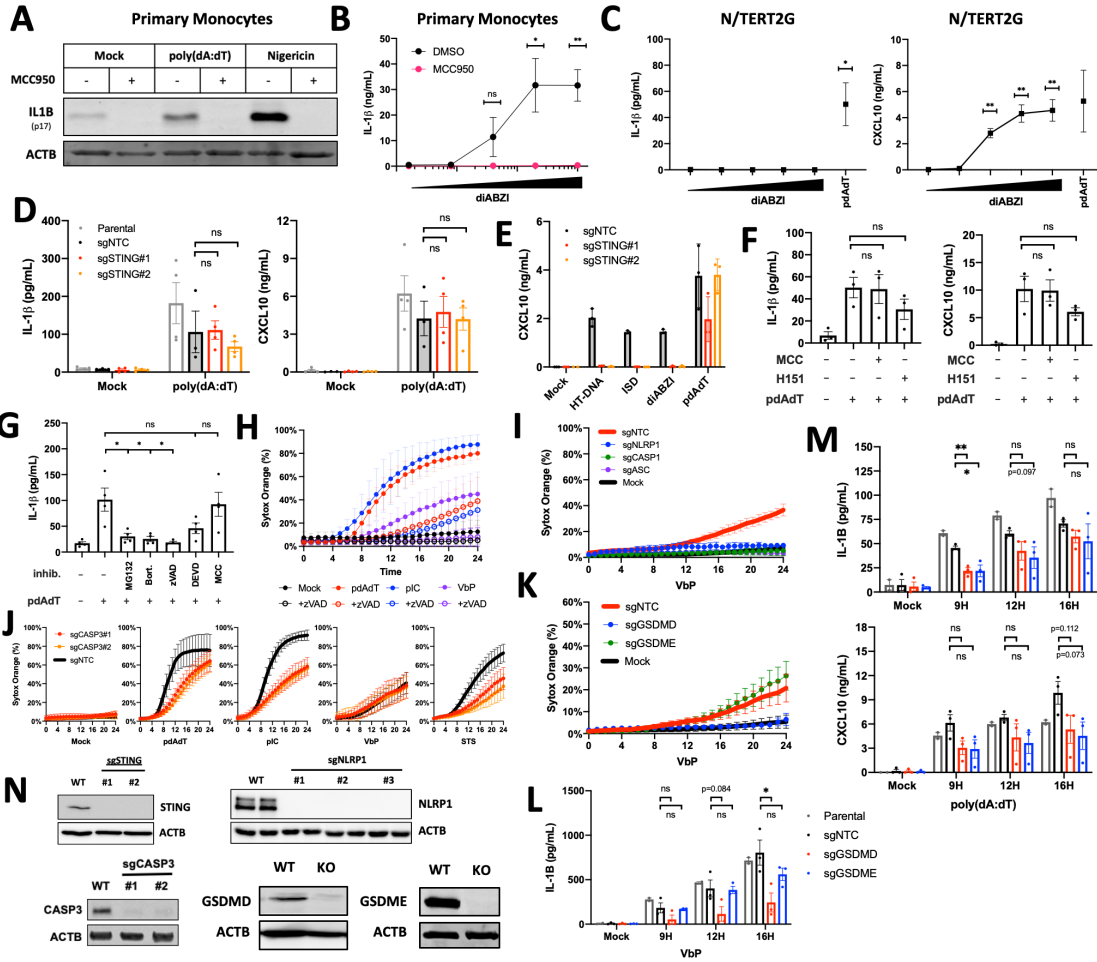

**Figure S2. STING activation propels the poly(dA:dT)-induced inflammasome in human monocytes but not keratinocytes.** (A) Human monocytes were primed with 2  $\mu\text{g/mL}$  PAM3CSK4 for 3H, pretreated with 1H 10  $\mu\text{M}$  MCC950, then transfected with 1  $\mu\text{g/mL}$  poly(dA:dT) for 9H or stimulated with 5  $\mu\text{M}$  nigericin for 6H in serum-free conditions. Supernatants were precipitated for Western blot. (B, C) PAM3CSK4-primed human monocytes ( $n=4$ ) or N/TERT2G keratinocytes ( $n=3$ ) were pretreated with 10  $\mu\text{M}$  MCC950 and stimulated with 0.6 nM to 10  $\mu\text{M}$  diABZI for 9H. As a control, N/TERT2G were transfected with 1  $\mu\text{g/mL}$  poly(dA:dT) for 9H and supernatants were analyzed by ELISA. (D-E) Monoclonal N/TERT2G knockout cell lines were transfected with 1  $\mu\text{g/mL}$  poly(dA:dT), 1  $\mu\text{g/mL}$  HT-DNA, 1  $\mu\text{g/mL}$  ISD, or stimulated with 1  $\mu\text{M}$  diABZI for 12H and ELISA was performed on supernatants ( $n=2-4$ ). (F) N/TERT2G were pretreated with 10  $\mu\text{M}$  MCC950 or 10  $\mu\text{M}$  H-151 and transfected with 1  $\mu\text{g/mL}$  poly(dA:dT) for 12H, then analyzed by ELISA ( $n=4$ ). (G) N/TERT2G were pretreated 2  $\mu\text{M}$  MG-132, 0.1  $\mu\text{M}$  Bortezomib, 25  $\mu\text{M}$  z-VAD-FMK, 25  $\mu\text{M}$  z-DEVD-FMK, or 10  $\mu\text{M}$  MCC950 and transfected with 1  $\mu\text{g/mL}$  poly(dA:dT) for 12H for analysis by ELISA ( $n=4$ ). (H) N/TERT2G keratinocytes were incubated with 25  $\mu\text{M}$  z-VAD-FMK for 1H, then transfected with 1  $\mu\text{g/mL}$  poly(dA:dT), 1  $\mu\text{g/mL}$  poly(I:C), or stimulated with 5  $\mu\text{M}$  VbP and monitored with sytox orange live cell imaging ( $n=2$ ). (I, K-M) Monoclonal N/TERT2G knockouts were stimulated with 5  $\mu\text{M}$  VbP or transfected with 1  $\mu\text{g/mL}$  poly(dA:dT) for indicated timepoints and subject to sytox orange live cell imaging ( $n=2-3$ ) or ELISA ( $n=3$ ). (J) Polyclonal N/TERT2G CASP3 knockouts were transfected or stimulated with 1  $\mu\text{g/mL}$  poly(dA:dT), 1  $\mu\text{g/mL}$  poly(I:C), 5  $\mu\text{M}$  VbP, and 1  $\mu\text{M}$  STS and monitored with sytox orange live cell imaging ( $n=3$ ). (N) Western blots were performed on N/TERT2G knockout cell lines. Data represents mean  $\pm$  SEM (B-D, F-G, J-M) from at least three independent experiments. Otherwise, mean  $\pm$  SD (E, H-I) or a representative blot (A) of at least

two independent experiments is shown. \*P < 0.05, \*\*P < 0.01, \*\*\*P < 0.001, two-tailed Student's t-test.

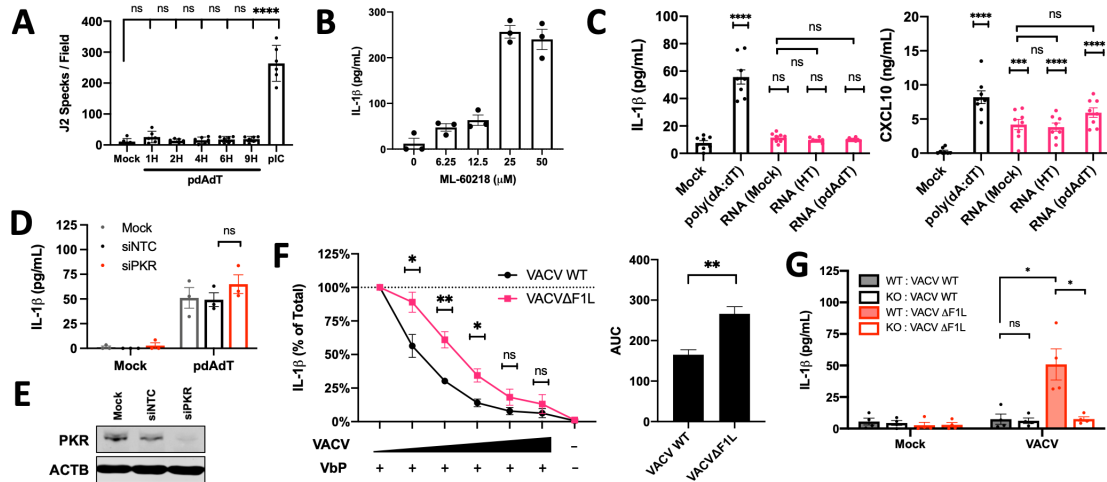

**Figure S3. VACV F1L antagonizes the NLRP1 inflammasome.** (A) N/TERT2G cells were transfected with 1  $\mu\text{g}/\text{mL}$  poly(dA:dT) for indicated time points or poly(I:C) for 4H. Cells were fixed, stained, and J2 positive specks were quantified by immunofluorescence ( $n=6$ ). (B) N/TERT2G cells were treated with RNA polymerase III inhibitor ML-60218 at indicated concentrations for 9H and ELISA was performed on supernatants ( $n=2$ ). (C) 293T cells were transfected with 2  $\mu\text{g}/\text{mL}$  HT-DNA or poly(dA:dT) for 12H and total RNA was isolated with trizol or silica-based columns. Then, 1  $\mu\text{g}/\text{mL}$  of isolated RNA was transfected into N/TERT2G cells for 9H and supernatants were analyzed by ELISA ( $n=8$ ). (D-E) N/TERT2G keratinocytes were transfected with 25 nM DharmaFECT siRNA for 48 hours. Then, cells were transfected with 1  $\mu\text{g}/\text{mL}$  poly(dA:dT) or stimulated with 2  $\mu\text{M}$  anisomycin for 6 hours. Supernatants were analyzed by ELISA and lysates by Western Blot ( $n=3$ ). (F) N/TERT2G were infected with increasing multiplicity of infection (MOI) of VACV COP WT or  $\Delta\text{F1L}$  ( $0.003 < \text{MOI} < 2$ ) then co-stimulated with 5  $\mu\text{M}$  VbP for 16H. Supernatants were assessed by ELISA and IL-1 $\beta$  released was normalized as a percentage of total ( $n=3$ ). (G) N/TERT2G wild type or NLRP1 knockout cells were infected with VACV COP WT or  $\Delta\text{F1L}$  (MOI 10) for 9H and ELISA was performed on the supernatant ( $n=4$ ). Data represents mean  $\pm$  SEM (C-D, F-G) from at least three independent experiments, mean  $\pm$  SD (A) of combined data from two independent experiments performed in triplicate, mean  $\pm$  SD (B) from a representative experiment of two independent experiments performed in triplicate, or a representative blot (E) from three independent experiments. If not otherwise indicated, statistical comparisons were made with respect to the mock-treated control. \* $P < 0.05$ , \*\* $P < 0.01$ , \*\*\* $P < 0.001$ , two-tailed Student's t-test.

**Figure S4**

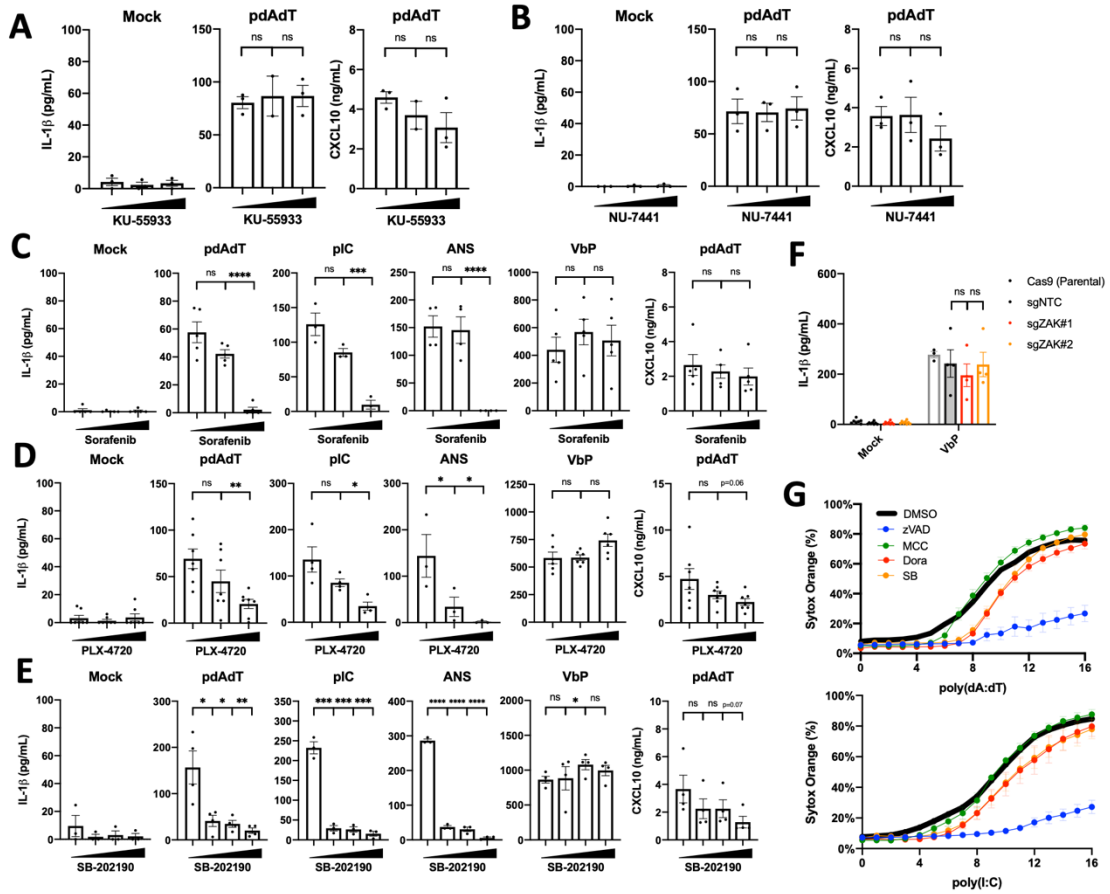

**Figure S4. Second generation p38 inhibitors but not DNA damage pathway kinase inhibitors antagonize poly(dA:dT) IL-1 $\beta$  release.** (A-E) N/TERT2G were pretreated with 0.1/1  $\mu$ M KU-55933, 0.1/1  $\mu$ M NU-7441, 0.2/2  $\mu$ M Sorafenib, 0.1/1  $\mu$ M PLX-4720, or 0.1/1/10  $\mu$ M SB-202190, then transfected with 9H 1  $\mu$ g/mL poly(dA:dT), 9H 1  $\mu$ g/mL poly(I:C), or stimulated with 6H 2  $\mu$ M anisomycin and 16H 5  $\mu$ M VbP. Supernatants were analyzed by ELISA (n=3-6). (F) Polyclonal ZAK knockout N/TERT2G keratinocytes were stimulated with 12H 5  $\mu$ M VbP and supernatants were used for ELISA (n=4). (G) Wild-type N/TERT2G were pretreated with 25  $\mu$ M z-VAD-FMK, 10  $\mu$ M MCC950, 100 nM doramapimod, or 100 nM SB-202190 and transfected with 1  $\mu$ g/mL poly(dA:dT) or poly(I:C) and monitored with sytox orange live cell imaging (n=4). Data represents mean  $\pm$  SEM (A-G) from at least three independent experiments. \*P < 0.05, \*\*P < 0.01, \*\*\*P < 0.001, two-tailed Student's t-test.

| <b>Dataset</b> | <b>N</b> | <b>Reference</b>                          |
|----------------|----------|-------------------------------------------|
| GSE171170      | 3        | Gupta et al. (2021) <sup>1</sup>          |
| GSE124939      | 5        | Tsoi et al. (2019) <sup>2</sup>           |
| GSE107871      | 4        | Swindell et al. (2017) <sup>3</sup>       |
| GSE173902      | 2        | Murai-Yamamura et al. (2021) <sup>4</sup> |
| GSE109182      | 3        | Swindell et al. (2018) <sup>5</sup>       |
| GSE101216      | 4        | Bandiera et al. (2021) <sup>6</sup>       |
| GSE120784      | 3        | Witte-Handel et al. (2019) <sup>7</sup>   |
| GSE119317      | 4        | Anderson et al. (2018) <sup>8</sup>       |
| GSE185309      | 8        | Unpublished                               |

**Table S1.** RNA-seq studies utilized in meta-analysis

| <b>sgRNA</b> | <b>Target Sequence</b> |
|--------------|------------------------|
| sgGFP        | GGTGAACCGCATCGAGCTGA   |
| sgAIM2       | GATACTCTTGCTAACAGGCC   |
| sgNLRP1      | GCTCCCCATACTGAGCCACC   |
| sgCASP1#1    | TAATGAGAGCAAGACGTGTG   |
| sgCASP1#2    | ATGTCTCATGGTATTCGGGA   |
| sgCASP3#1    | GAAGCGAATCAATGGACTC    |
| sgCASP3#2    | ATTATACATAAACCCATCTC   |
| sgPYCARD#1   | CTGGAGAACCTGACCGCCG    |
| sgPYCARD#2   | AACTTCTTGAGCTCCTCGG    |
| sgTMEM173    | AGAGCACACTCTCCGGTACC   |
| sgGSDMD      | GCATGGGGTCGGCCTTTGAG   |
| sgGSDME      | GTCGGACTTTGTGAAATACG   |
| sgMAP3K20#1  | TGTATGGTTATGGAACCGAG   |
| sgMAP3K20#2  | TGCATGGACGGAAGACGATG   |

**Table S2.** CRISPR/Cas9 Target Sequences



| <b>Gene</b> | <b>Forward Primer</b>                 | <b>Reverse Primer</b>          |
|-------------|---------------------------------------|--------------------------------|
| AIM2        | GCC ACT AAG TCA AGC TGA AAT<br>G      | CAG GCT TAA CAT GAG GAG AGA C  |
| CXCL10      | GTG GCA TTC AAG GAG TAC CTC           | TGA TGG CCT TCG ATT CTG GAT T  |
| HPRT        | ATC AGA CTG AAG AGC TAT TGT<br>AAT GA | TGG CTT ATA TCC AAC ACT TCG TG |
| IL1B        | TCC CCA GCC CTT TTG TTG A             | TTA GAA CCA AAT GTC GCC GTG    |

**Table S3.** qPCR Oligos

| Target    | Clone | Type                     | Genotype |
|-----------|-------|--------------------------|----------|
| sgNLRP1   | #1    | Homozygous KO            | -4/-4    |
| sgNLRP1   | #2    | Homozygous KO            | -1/-1    |
| sgNLRP1   | #3    | Compound Heterozygous KO | -1/+1    |
| sgCARD8   | #1    | Compound Heterozygous KO | -2/-3    |
| sgTMEM173 | #1    | Homozygous KO            | -4/-4    |
| sgTMEM173 | #2    | Homozygous KO            | -8/-8    |
| sgGSDMD   | #1    | Homozygous KO            | +1/+1    |
| sgGSDME   | #1    | Homozygous KO            | +1/+1    |

**Table S4.** Genotyping results for monoclonal CRISPR/Cas9 cell lines

**Dataset S1 (separate file).**

Public RNA-seq data of healthy human keratinocytes (n=38) were downloaded and a meta-analysis was performed to re-quantify gene expression based on a uniform reference transcriptome. Transcripts per million (TPM) of each sample and gene was computed. Columns represent samples and rows represent genes.

**Movie S1 (separate file).**

N/TERT2G keratinocytes were transfected with 1 µg/mL poly(dA:dT) with 2 uL/mL lipofectamine 2000, or stimulated with 5 µM VbP. Cells were monitored by live-cell imaging using sytox orange dye with pictures taken at 1-hour intervals for 24 hours.

**SI References**

1. Gupta, R. K. *et al.* TWEAK functions with TNF and IL-17 on keratinocytes and is a potential target for psoriasis therapy. *Sci. Immunol.* **6**, 8823 (2021).
2. Tsoi, L. C. *et al.* Hypersensitive IFN Responses in Lupus Keratinocytes Reveal Key Mechanistic Determinants in Cutaneous Lupus. *J. Immunol.* **202**, 2121–2130 (2019).
3. Swindell, W. R. *et al.* RNA-seq identifies a diminished differentiation gene signature in primary monolayer keratinocytes grown from lesional and uninvolved psoriatic skin. *Sci. Reports 2017 71* **7**, 1–13 (2017).
4. Murai-Yamamura, M. *et al.* TH2 cytokines and *Staphylococcus aureus* cooperatively induce atopic dermatitis-like transcriptomes. *Allergy* **76**, 3534–3537 (2021).
5. Swindell, W. R. *et al.* RNA-seq analysis of IL-1B and IL-36 responses in epidermal keratinocytes identifies a shared MyD88-dependent gene signature. *Front. Immunol.* **9**, 80 (2018).
6. Bandiera, R. *et al.* RN7SK small nuclear RNA controls bidirectional transcription of highly expressed gene pairs in skin. *Nat. Commun.* 2021 121 **12**, 1–14 (2021).
7. Witte-Händel, E. *et al.* The IL-1 Pathway Is Hyperactive in Hidradenitis Suppurativa and Contributes to Skin Infiltration and Destruction. *J. Invest. Dermatol.* **139**, 1294–1305 (2019).
8. Anderson, E. D. *et al.* Prolonging culture of primary human keratinocytes isolated from suction blisters with the Rho kinase inhibitor Y-27632. *PLoS One* **13**, e0198862 (2018).
